# Supplementary material for: Synergetic polarization effect of protonation and Fe-doping on g-C3N4 with enhanced photocatalytic activity
Source: Royal Society of Chemistry journal article supplement (doi:10.1039/d1cy01096d), 2021-01-01
Supplement: d1cy01096d1.pdf [file d1cy01096d1.pdf]

Supporting Information for

**Synergetic polarization effect of protonation and Fe-doping toward  
g-C<sub>3</sub>N<sub>4</sub> with enhanced photocatalytic activity**

Xiaogang Liu<sup>\*a</sup>, Wenjie Chen<sup>a</sup>, Wei Wang<sup>b</sup> and Zhengbo Jiao<sup>\*c</sup>

*a. College of Chemistry and Chemical Engineering, Xinyang Normal University, Xinyang, Henan 464000, P. R. China.*

*b. State Key Laboratory of High-efficiency Utilization of Coal and Green Chemical Engineering, Ningxia University, Yinchuan 750021, P. R. China.*

*c. Institute of Materials for Energy and Environment, and College of Material Science and Engineering, Qingdao University, Qingdao 266071, China*

*E-mail: [lxg133298@163.com](mailto:lxg133298@163.com); [jiaozhb@163.com](mailto:jiaozhb@163.com)*

**Additional figures and tables.**

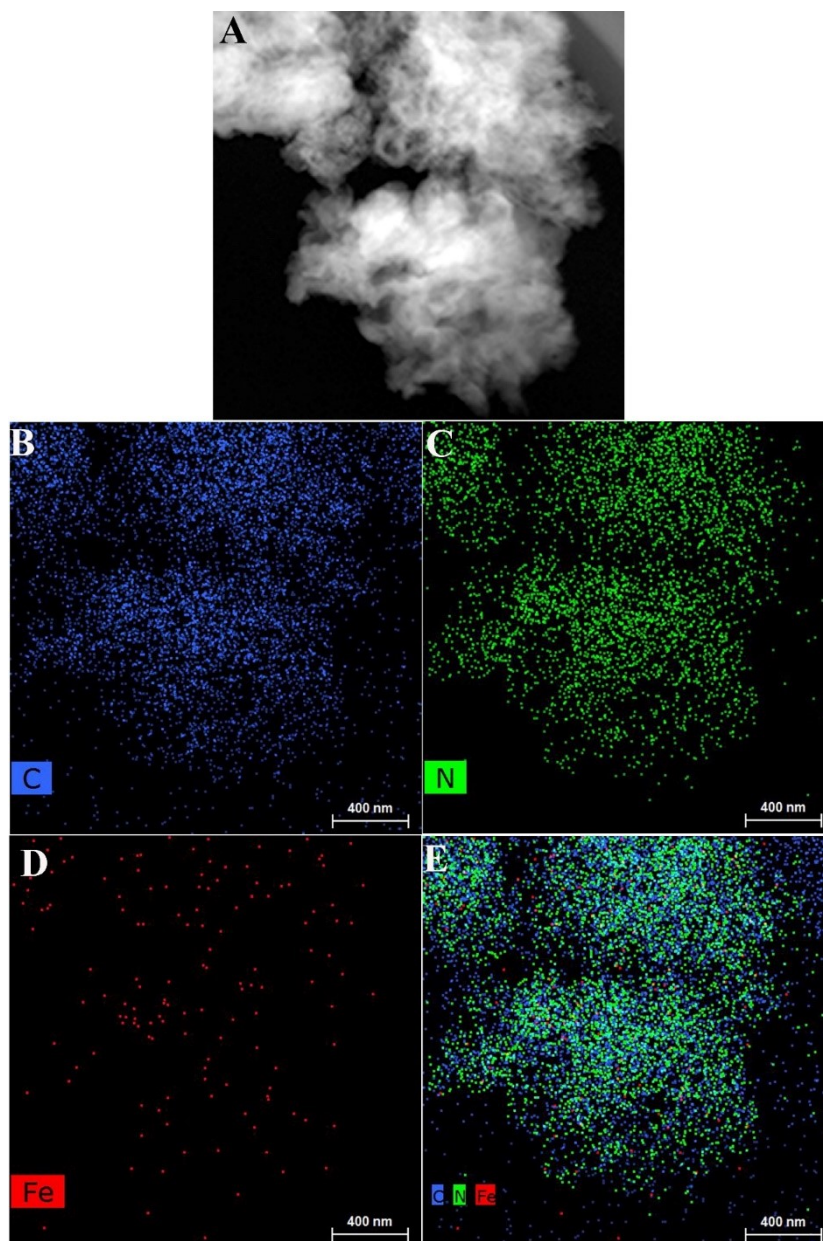

**Figure S1.** (A) The morphology and EDX-mapping images of C (B), N (C), Fe (D) and C, N , Fe elements for the as-prepared H-CN@Fe photocatalyst.

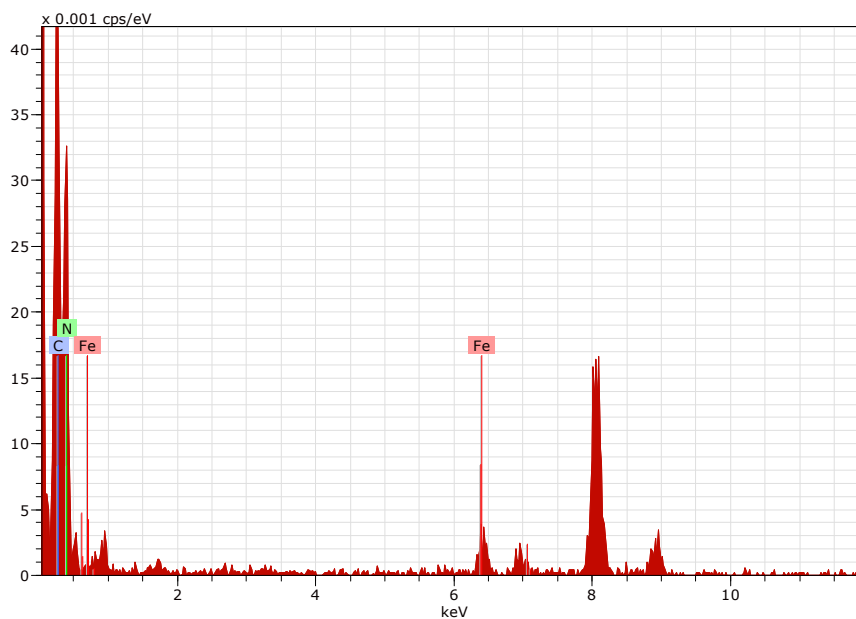

**Figure S2.** EDX patterns of as-prepared H-CN@Fe

**Table S1.** EDX element composition of as-prepared H-CN@Fe

| Element | wt. % | at. % | Error |
|---------|-------|-------|-------|
| C-K     | 53.12 | 58.09 | 2.56  |
| N-K     | 43.96 | 41.22 | 2.27  |
| Fe-K    | 2.92  | 0.69  | 0.34  |

**Table S2.** The fitting results of EIS curves for CN, CN@Fe, H-CN, H-CN@Fe.  $R_s$  and  $R_{ct}$  represents the solution resistance and the charge transfer resistance across the electrode-solution interface.

| Sample  | $R_s$ ( $\Omega$ ) | $R_{ct}$ ( $\Omega$ ) |
|---------|--------------------|-----------------------|
| CN      | 4.39               | $6.22 \times 10^4$    |
| CN@Fe   | 3.92               | $5.08 \times 10^4$    |
| H-CN    | 3.79               | $4.58 \times 10^4$    |
| H-CN@Fe | 3.63               | $4.55 \times 10^4$    |

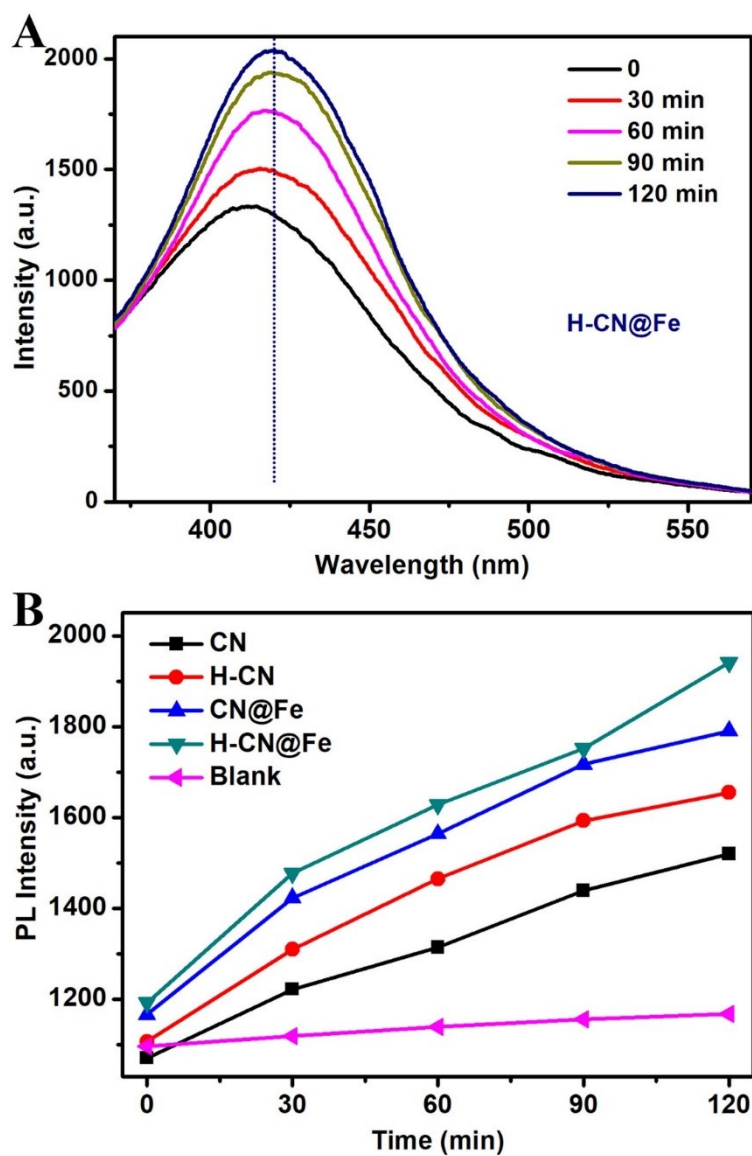

**Figure S3.** (A) Fluorescence spectra of TAOH solution over H-CN@Fe; (B) the PL intensity versus reaction time over CN, H-CN, CN@Fe and H-CN@Fe.

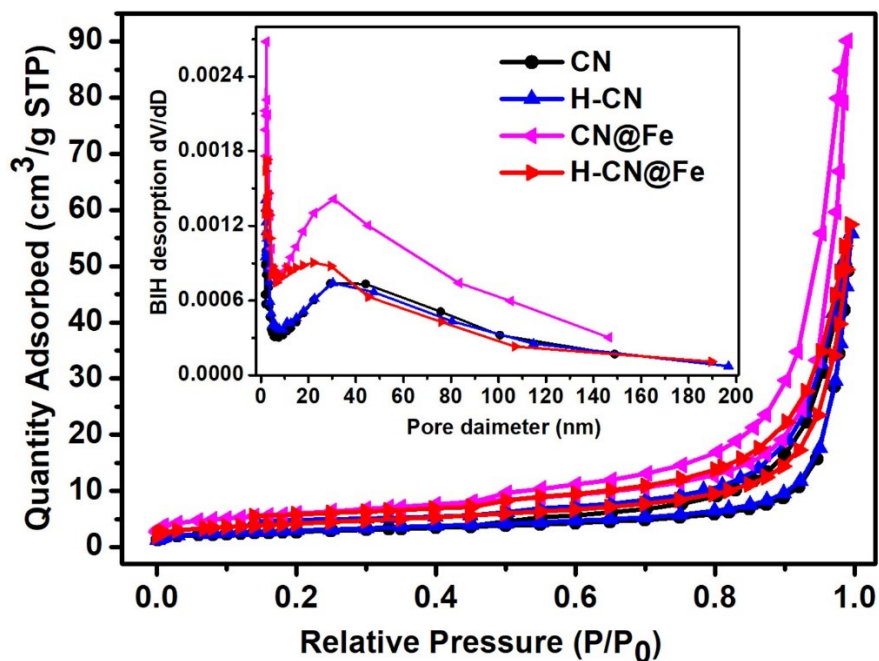

**Figure S4.** N<sub>2</sub> adsorption-desorption curves of CN, H-CN, CN@Fe and H-CN@Fe catalysts (inset: Barrett-Joyner-Halenda (BJH) based pore distribution analyses).

**Table S3.** The texture characteristics of prepared CN, H-CN, CN@Fe and H-CN@Fe catalysts.

| Catalyst | $S_{\text{BET}}$<br>(m <sup>2</sup> /g) | $V_p$<br>(cm <sup>3</sup> /g) | $D_p$<br>(nm) |
|----------|-----------------------------------------|-------------------------------|---------------|
| CN       | 9.74                                    | 0.078                         | 30.62         |
| H-CN     | 10.44                                   | 0.088                         | 30.97         |
| CN@Fe    | 21.10                                   | 0.14                          | 26.26         |
| H-CN@Fe  | 14.75                                   | 0.090                         | 23.22         |
